# Supplementary material for: Corylifol A from Psoralea corylifolia L. Enhances Myogenesis and Alleviates Muscle Atrophy
Source: PubMed Central journal article supplement (PMC7084366; doi:10.3390/ijms21051571), 2020-02-25
Supplement: ijms-21-01571-s001.pdf [file ijms-21-01571-s001.pdf]

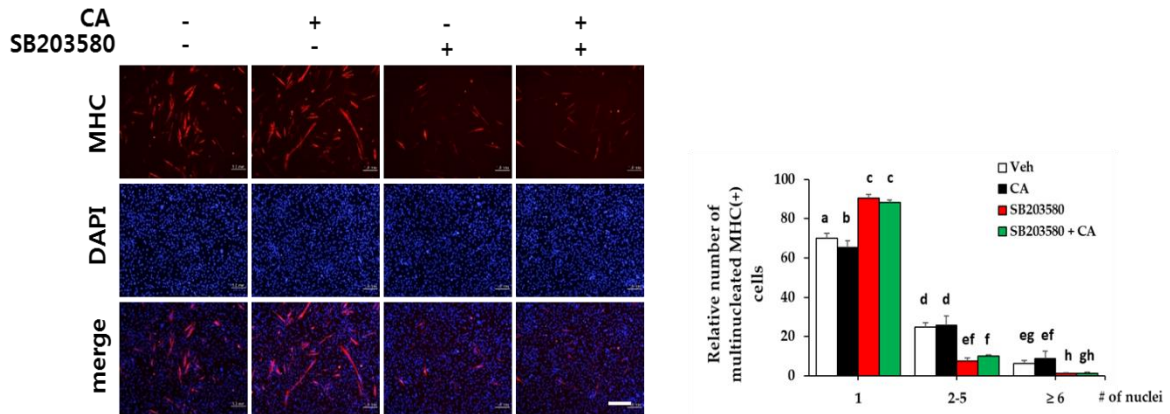

**Supplementary Figure S1. Effect of corylifol A on p38 MAPK activation during myogenesis.**

C2C12 cells were pre-treated with SB203580 (10  $\mu$ M) prior to corylifol A and then differentiated in DM for 2 days, and immunostained with MHC (red) and DAPI (blue). Scale bar = 200  $\mu$ m. The images are representative of three independent experiments with similar results. Means without a common superscript differ significantly ( $p < 0.05$ ).
